# Supplementary material for: Evaluation of the multifunctional activity of silver bionanocomposites in environmental remediation and inhibition of the growth of multidrug-resistant pathogens
Source: Royal Society of Chemistry journal article supplement (doi:10.1039/d1nj06198d), 2022-01-01
Supplement: d1nj06198d1.pdf [file d1nj06198d1.pdf]

1 **Electronic Supplementary Material (ESI) for New Journal of Chemistry.**

2 **This journal is © The Royal Society of Chemistry and the Centre National de la**

3 **Recherche Scientifique 2021**

4

5 **Supplementary Information**

6

7 **Evaluation of the multifunctional activity of silver bionanocomposites in environment**

8 **remediation and inhibition of growth of multidrug-resistant pathogens**

9

10 Rebika Baruah<sup>a,b</sup>, Archana Yadav<sup>c</sup>, Archana Moni Das<sup>a,b\*</sup>

11 <sup>a</sup>Natural product Chemistry Group, Chemical Science and Technology Division,

12 CSIR-North East Institute of Science and Technology, Jorhat, Assam, India-785006

13 <sup>b</sup>Academy of Scientific and Innovative Research (AcSIR), Ghaziabad- 201002, India

14 <sup>c</sup>Biotechnology Group, Biological Science and Technology Division,

15 CSIR- North East Institute of Science and Technology, Jorhat, Assam, India-785006

16 \*Corresponding author. Tel.: +919435489369.

17 E-mail address: archanamoni@neist.res.in

18

19

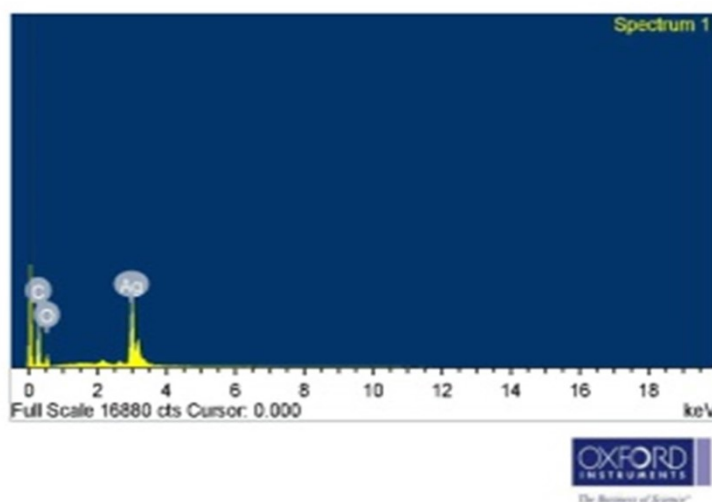

20

| Elements | Weight% | Atomic% |
|----------|---------|---------|
| C K      | 27.35   | 34.17   |

|               |              |              |
|---------------|--------------|--------------|
| <b>O K</b>    | <b>36.90</b> | <b>54.36</b> |
| <b>Ag L</b>   | <b>35.75</b> | <b>11.47</b> |
| <b>Totals</b> | <b>100</b>   |              |

21

22 **Fig. S1** EDX spectra and elemental weight% and atomic% of cellulose-supported Ag

23 bionanocomposites.

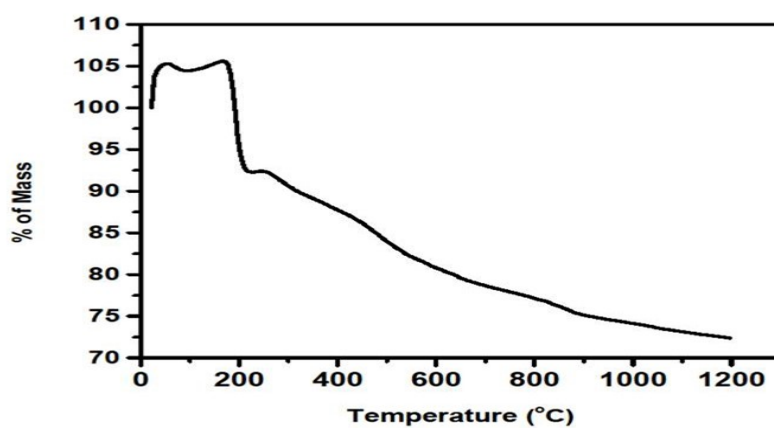

24

25

[a]

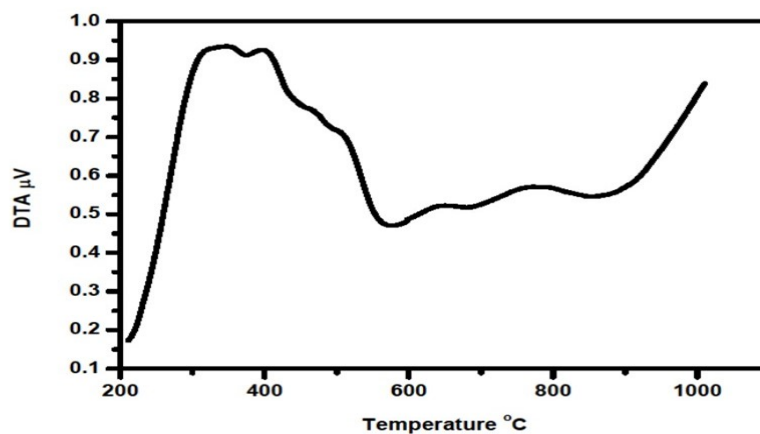

26

27

[b]

28 **Fig. S2** TGA [a] and DTA [b] thermogram of cellulose-supported Ag bionanocomposites.

29

30

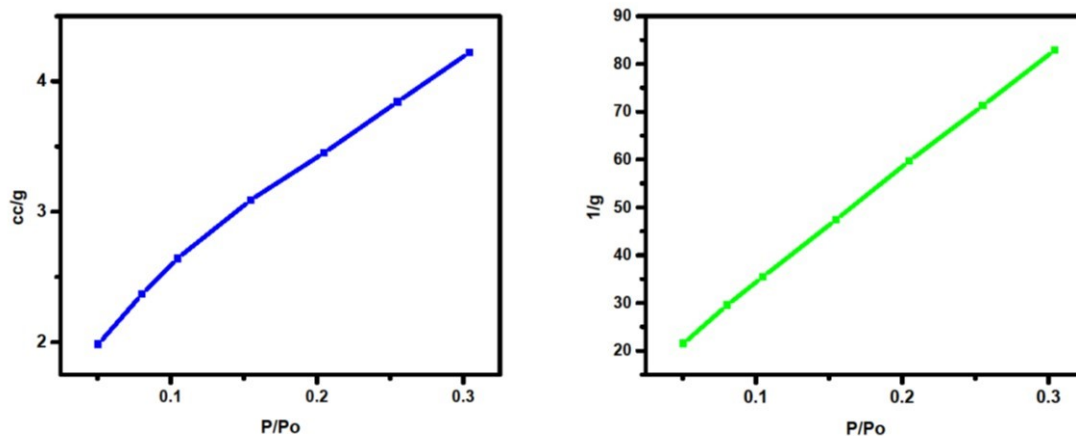

31

32 **Fig. S3** Nitrogen adsorption-desorption BET isotherms for the cellulose-supported Ag  
 33 binanocomposites.

34

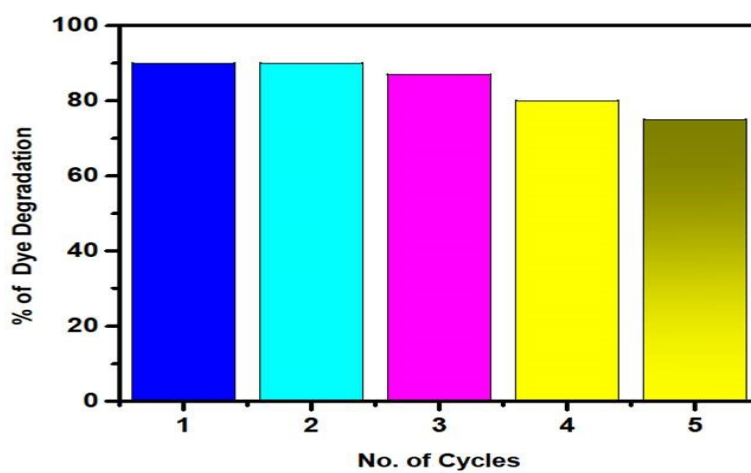

35

36 **Fig. S4** Reusability of the AGC NCs in the degradation of Brilliant blue FCF.

37

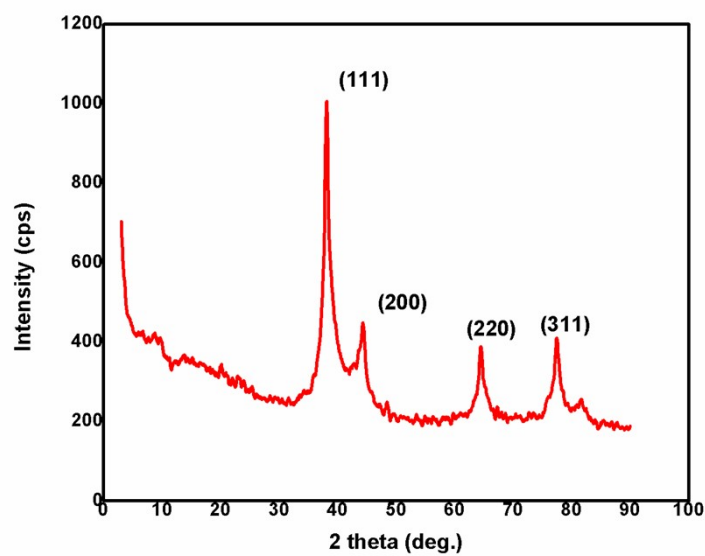

38

39 **Fig. S5** XRD pattern of AGC NCs after five catalytic cycles.

39

40

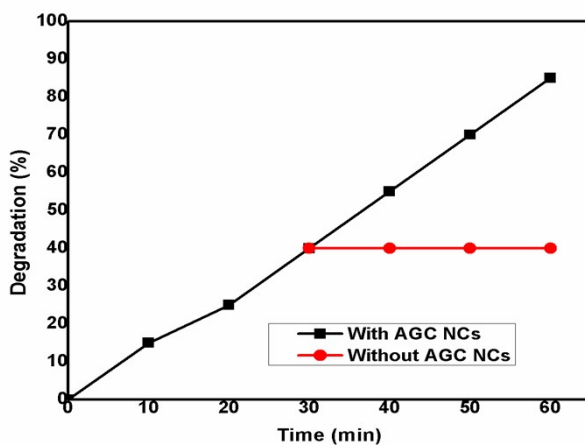

41

42

43

44

**Fig. S6** Heterogeneity test of the AGC NCs in the degradation of 2-nitroaniline.

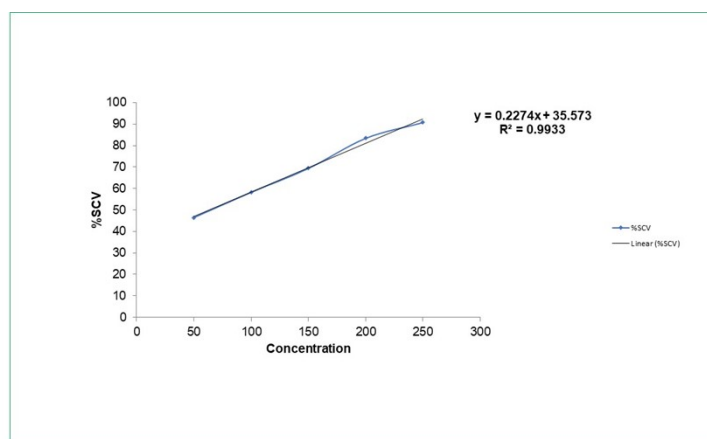

45

46

**Fig. S7** Antioxidant activity of cellulose-supported Ag bionanocomposites.

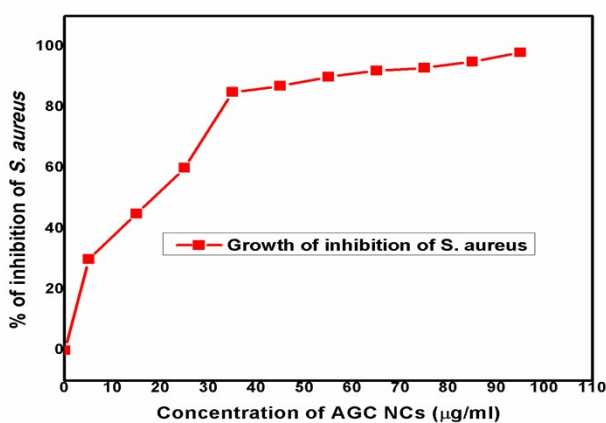

47

48

49

**Fig. S8** Growth of inhibition of *S. aureus* at different concentrations of AGC NCs.

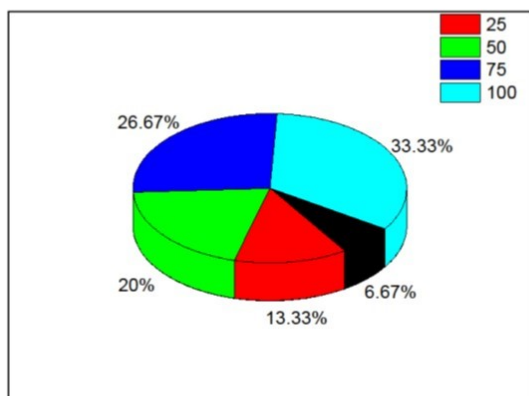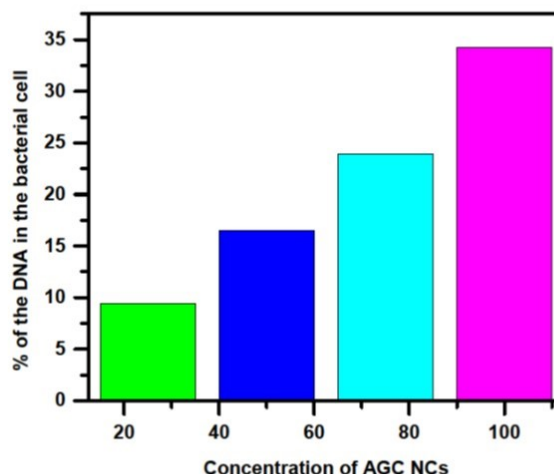

50

51

[a]

[b]

52 **Fig. S9** ROS generation [a] and percentage of DNA [b] in the *Klebsiella pneumoniae* cell in  
53 the presence of AGC NCs.

54 **Table S1** Comparison of photocatalytic properties of AGC NCs with reported catalyst in  
55 literature

| SI No. | Catalyst                                    | Dye                | Results                                                           | References |
|--------|---------------------------------------------|--------------------|-------------------------------------------------------------------|------------|
| 1      | <i>Alpinia nigra</i> fruits mediated Ag NPs | Orange G           | Degradation up to 79.9% in 90 min                                 | 1          |
| 2      | AGC NCs                                     | Orange G           | Degradation up to 85% in 60 min                                   | Our Study  |
| 3      | GO/CNTs/Ag nanohybrids                      | Phenol Red         | Degradation up to 81.4% in 120 min under UV irradiation           | 2          |
| 4      | AGC NCs                                     | Phenol Red         | Degradation up to 84.4% in 60 min under solar irradiation         | Our Study  |
| 5      |                                             | Brilliant Blue FCF | Degradation up to 60% in 100 min in presence of NaBH <sub>4</sub> | 3          |
| 6      | AGC NCs                                     | Brilliant Blue     | Degradation up                                                    | Our study  |

|  |  |     |                                                              |  |
|--|--|-----|--------------------------------------------------------------|--|
|  |  | FCF | to 90% in 60 min<br>without use of<br>any reducing<br>agents |  |
|--|--|-----|--------------------------------------------------------------|--|

56

57 **Table S2** MIC of AGC NCs

| Bacterial strains   | MIC( $\mu\text{g/ml}$ ) |
|---------------------|-------------------------|
| <i>S. aureus</i>    | 35                      |
| <i>E. coli</i>      | 15                      |
| <i>B. subtilis</i>  | 30                      |
| <i>K. pneumonia</i> | 15                      |
| <i>C. albicans</i>  | 15                      |

58

59 References

60

61 1 D. Baruah, R. N. S. Yadav, A. Yadav, and A. M. Das, *J. Photochem. Photobiol. B Biol.*,

62 2019, **201**, 111649.

63 2 A. Singh, S. Chahal, H. Dahiya, A. Goswami, and S. Nain, *Mater. Express*, 2021, **11**,

64 936-946(11).

65 3 A. S. Al-Shehri, Z. Zaheer, A. M. Alsudairi, and S. A. Kosa, *ACS Omega* 2021, **6**,

66 27510–27526.

67

68

69

70
